# Supplementary material for: A highly enantioselective synthesis of cyclic α-amino acids involving a one-pot, single catalyst, tandem hydrogenation–hydroformylation sequenceElectronic supplementary information (ESI) available: experimental information. See http://www.rsc.org/suppdata/cc/b2/b200374k/
Source: Royal Society of Chemistry journal article supplement (doi:10.1039/b200374k), 2002-04-04
Supplement: b200374k.doc [file b200374k.doc]

# Supplementary data

Rhodium-catalyzed hydrogenation and hydroformylation of (2*Z*)-Methyl 2-acetamidopenta-2,4-dienoate **1b**: Synthesis of (2*S*)-methyl *N*-acetyl-5,6-didehydropipecolate **4b** and (2*S*)-methyl *N*-acetyl-4-methyl-4,5-didehydropipecolate **5b**.

(2*Z*)-Methyl 2-acetamidopenta-2,4-dienoate (1b) (0.05 g, 0.30 mmol) and [(COD)Rh(I)-(*S*,*S*)-Et-DuPHOS] OTf (1-2 mg) were dissolved in benzene and transferred into a 100ml Parr autoclave. The autoclave was charged with hydrogen (30 psi). After 3h, the hydrogen was vented and the autoclave was pressurized to 80 psi of CO/H2 (1:1 molar ratio) and heated to 80C for 72h. The autoclave was then cooled to ambient temperature and the solvent was removed under reduced pressure to give a yellow oil. The 1H n.m.r. spectrum of the crude oil showed two compounds, ((2*S*)-Methyl *N*-acetyl-5,6-didehydropipecolate (**4b**) and (2*S*)-Methyl *N*-acetyl-4-methyl-4,5-didehydropipecolate **5b** in 54:46 ratio. Column chromatography (SiO2, ethyl acetate: petroleum ether; 3:1) firstly gave (2*S*)-Methyl *N*-acetyl-5,6-didehydropipecolate **4b** as a colourless oil (0.02 g, 40%), (Rf 0.5). A solution of the purified compound **4b** in HPLC grade isopropanol (10 l) was injected into a Varian LC model 5000 with Varian UV-50 detector containing a Chiralcel OD column (1.0 ml/min, 10% isopropanol: 90% hexane) to give two peaks; (*S*) t1 = 9.3 mins with 94.38% area, (*R*) t2 = 26.2 mins with 2.62 % area. max (Film): 3468br, 2955w, 2847w, 1744m, 1674m, 1645s, 1437w, 1417m, 1383m, 1347m, 1208m, 1045m, 989m, 887w, 721w cm-1. 1H n.m.r. (300 MHz, CDCl3):  1.80-2.12, m, 3H, H3 and H4a; 2.23, s, 3H, (2.13, s, 3H)†, COCH3; 2.35-2.41, m, 1H, H4b; 3.73, s, 3H, (3.75, s, 3H)†, COOCH3; 4.95-5.01, m, 1H, (5.00-5.10, m, 1H)†, H5; 5.23-5.26, m, 1H, (4.65-4.66, m, 1H)†, H2; 6.63, d, *J* 8.6 Hz, 1H, H6. 13C n.m.r. (75 MHz, CDCl3) :  18.9, (18.6)†, C3; 21.5, COCH3; 23.3, (23.9)†, C4; 51.7, (55.7)†, C2; 52.3, (52.6)†, COOCH3; 107.1, (107.0)†, C5; 125.1, (123.2)†, C6; 168.5, COCH3; 171.0, COOCH3. †Rotomer present. Microanalysis : Found, C 59.01%, H 7.12%, N 7.60%. C9H13NO3 requires C 58.99%, H 7.16%, N 7.65% .

Further elution gave (2*S*)-Methyl *N*-acetyl-4-methyl-4,5-didehydropipecolate **5b** as a colourless oil(0.03 g, 51%), (Rf 0.3). A solution of the purified compound **5b** in HPLC grade isopropanol (10 l) was injected into a Varian LC model 5000 with Varian UV-50 detector containing a Chiralcel OD column (1.0 ml/min, 10% isopropanol: 90% hexane) to give two peaks; (*S*) t1 = 12.2 mins with 99.03% area, (*R*) t2 = 26.2 mins with 0.19 % area. max (Film): 3296br, 2958w, 2874w, 1746m, 1654m, 1542s, 1438w, 1375m, 1273w, 1208m, 1156w, 1023w, 968w, 884w cm-1. 1H n.m.r. (300 MHz, CDCl3) :
 1.74, s, 3H, CH3; 2.14, s, 3H, COCH3; 2.47-2.54, m, 1H, H3; 2.89-2.99, m, 1H, H3; 3.76, s, 3H, COOCH3; 4.79-4.85, dd, *J* 6.2, 11.6 Hz, 1H, H2; 6.25, s, 1H, H5. 13C n.m.r. (75 MHz, CDCl3) :  18.8, C3; 21.7, COCH3; 23.3, CH3; 52.5, COOCH3; 58.3, C2; 120.1, C4; 130.1, C5; 169.9, COCH3; 173.2, COOCH3. Mass spectrum (ESI+, MeOH): *m/z* 206.0787 ([M+Na]+). C9H13NO3Na requires 206.0793.
